# Supplementary material
Source: PubMed Central journal article supplement (PMC7988305)
Supplement: NIHMS1631868-supplement-261_2020_2775_MOESM1_ESM.pdf [file NIHMS1631868-supplement-261_2020_2775_MOESM1_ESM.pdf]

**Article title:** \*\*Blinded for review\*\*

**Journal name:** Abdominal Radiology

**Author names:** \*\*Blinded for review\*\*

**Affiliation and e-mail address of the corresponding author:** \*\*Blinded for review\*\*

## ELECTRONIC SUPPLEMENTARY MATERIAL

### Supplemental Table 1 Reasons for exclusion from the study

| <b>Reason</b>                             | <b>N</b>   | <b>%</b> |
|-------------------------------------------|------------|----------|
| More than 2 lesions                       | 229        | 39%      |
| Incomplete follow-up                      | 53         | 9%       |
| Incomplete pretreatment imaging           | 119        | 20%      |
| Previous embolization                     | 39         | 7%       |
| Metastatic HCC at time of presentation    | 11         | 2%       |
| Previous liver resection                  | 103        | 18%      |
| Second active malignancy                  | 5          | 1%       |
| Progression of disease at first follow-up | 16         | 3%       |
| SIRT                                      | 1          | 0%       |
| Embolization for reason other than HCC    | 6          | 1%       |
| <b>TOTAL</b>                              | <b>582</b> |          |

Abbreviations: HCC, hepatocellular carcinoma; SIRT; selective internal radiation therapy

**Supplemental Table 2** Pre-treatment variable associations with overall survival by reader (time 0 = date of first embolization)

| Variable                  | R1           |                  |              | R2           |                  |             |
|---------------------------|--------------|------------------|--------------|--------------|------------------|-------------|
|                           | N (# Events) | HR (95% CI)      | p-value      | N (# Events) | HR (95% CI)      | p-value     |
| PreTx size                | 85 (54)      | 1.10 (1.03-1.17) | <b>0.007</b> | 85 (54)      | 1.08 (1.01-1.15) | <b>0.02</b> |
| PreTx L1 APHE*            |              |                  |              | 85 (54)      |                  | 0.09        |
| Present                   |              |                  |              | 79 (52)      | Ref.             |             |
| Not present               |              |                  |              | 6 (2)        | 0.29 (0.07-1.22) |             |
| PreTx L1 WO               | 85 (54)      |                  | 0.56         | 85 (54)      |                  | 0.75        |
| Present                   | 82 (51)      | Ref.             |              | 78 (48)      | Ref.             |             |
| Not present               | 3 (3)        | 0.70 (0.21-2.34) |              | 7 (6)        | 0.87 (0.37-2.07) |             |
| PreTx L1 capsule          | 85 (54)      |                  | 0.81         | 85 (54)      |                  | 0.21        |
| Not present               | 60 (40)      | Ref.             |              | 55 (32)      | Ref.             |             |
| Present                   | 25 (14)      | 1.08 (0.58-2.01) |              | 30 (22)      | 1.42 (0.82-2.46) |             |
| PreTx L1 TG               | 80 (51)      |                  | 0.61         | 58 (38)      |                  | 0.28        |
| Not present               | 73 (46)      | Ref.             |              | 54 (35)      | Ref.             |             |
| Present                   | 7 (5)        | 0.78 (0.31-1.98) |              | 4 (3)        | 0.52 (0.16-1.72) |             |
| PreTx L1 LI-RADS category | 85 (54)      |                  | <b>0.004</b> | 85 (54)      |                  | <b>0.01</b> |
| LR- 5                     | 72 (42)      | Ref.             |              | 68 (42)      | Ref.             |             |
| LR-M                      | 4 (4)        | 0.96 (0.33-2.81) |              |              |                  |             |
| LR-TIV                    | 9 (8)        | 3.69 (1.69-8.05) |              | 10 (8)       | 2.27 (1.05-4.92) |             |
| LR-4                      |              |                  |              | 7 (4)        | 0.31 (0.09-1.04) |             |
| PreTx L2 LI-RADS category | 14 (8)       |                  | 0.91         | 14 (8)       |                  | 0.51        |
| LR-5                      | 11 (6)       | Ref.             |              | 10 (5)       | Ref.             |             |
| LR-3 or 4                 | 3 (2)        | 1.10 (0.20-5.89) |              | 4 (3)        | 1.66 (0.36-7.60) |             |

\* There was no variation in this variable for R1. 85 patients had values of 'present'.

Abbreviations: APHE, nonrim-like enhancement in the arterial phase; HR, Hazard Ratio; LI-RADS, Liver Reporting & Data System; L1, lesion 1; L2 lesion 2; LR, LI-RADS; TG, threshold growth; Tx, treatment; WO, was

**Supplemental Table 3** Clinical variable associations with overall survival (baseline set to first embolization date)

| Variable         | N (# Events) | HR (95% CI)       | p-value          |
|------------------|--------------|-------------------|------------------|
| Age at diagnosis | 85 (54)      | 1.01 (0.97–1.05)  | 0.60             |
| Sex              | 85 (54)      |                   | 0.16             |
| Male             | 68 (45)      | Ref.              |                  |
| Female           | 17 (9)       | 0.59 (0.29–1.22)  |                  |
| AFP*             | 85 (54)      | 1.66 (1.28–2.17)  | <b>&lt;0.001</b> |
| Bilirubin        | 85 (54)      | 1.31 (0.90–1.91)  | 0.16             |
| Albumin          | 85 (54)      | 0.74 (0.50–1.10)  | 0.14             |
| INR              | 85 (54)      | 1.21 (0.43–3.43)  | 0.72             |
| Child score      | 85 (54)      |                   | 0.13             |
| 0                | 50 (28)      | Ref.              |                  |
| 1                | 19 (13)      | 1.33 (0.69–2.58)  |                  |
| 2                | 14 (11)      | 1.32 (0.65–2.68)  |                  |
| 3                | 2 (2)        | 5.66 (1.27–25.11) |                  |
| ECOG             | 85 (54)      |                   | 0.40             |
| 0                | 55 (33)      | Ref.              |                  |
| 1                | 25 (19)      | 1.52 (0.86–2.69)  |                  |
| 2                | 2 (1)        | 1.32 (0.18–9.72)  |                  |
| 3                | 3 (1)        | 0.46 (0.06–3.41)  |                  |
| BCLC stage       | 85 (54)      |                   | 0.27             |
| B1               | 39 (25)      | Ref.              |                  |
| A0               | 5 (3)        | 0.72 (0.22–2.40)  |                  |
| C2               | 15 (6)       | 0.47 (0.19–1.14)  |                  |
| D3               | 26 (20)      | 1.14 (0.62–2.08)  |                  |

\*AFP was logarithmically transformed

Abbreviations: AFP, alpha-fetoprotein; BCLC, Barcelona Clinic Liver Cancer; ECOG, Eastern Cooperative Oncology Group; HCC, hepatocellular carcinoma; INR, international normalized ratio
